# Supplementary material for: Stereoselective solvent induced 1,3-proton transfer of an allylic alkoxide to a homoallylic alkoxide catalysed by a chiral lithium amideElectronic supplementary information (ESI) available: 1H NMR, 1H,1H-COSY NMR and 1H,1H-NOESY NMR spectra of 6; 1H NMR spectra of 5 and (S)-2H-5; 2H NMR spectrum of (S)-2H-5. See http://www.rsc.org/suppdata/p2/b1/b111676b/
Source: Royal Society of Chemistry journal article supplement (doi:10.1039/b111676b), 2002-02-28
Supplement: b111676b.doc [file b111676b.doc]

Supplementary data

**Suppl. Fig. 1** a.) 1H NMR spectrum of 6 recorded at 800 MHz and 25 °C (72 mM in C2HCl3). b.) 1H, 1H-COSY NMR spectrum of 6 recorded at 800 MHz and 25 °C (72 mM in C2HCl3). c.) 1H, 1H-NOESY spectrum 6 recorded at 800 MHz and 25 °C (72 mM in CHCl3).

# Suppl. Fig. 2 Extended a.) 1H NMR spectrum of 6 recorded at 800 MHz and 25 °C (72 mM in C2HCl3). b.) 1H, 1H-COSY NMR spectrum of 6 recorded at 800 MHz and 25 °C (72 mM in C2HCl3). c.) 1H, 1H-NOESY spectrum 6 recorded at 800 MHz and 25 °C (72 mM in CHCl3).

**Suppl. Fig. 3** a.) 1H NMR spectrum of **5** recorded at 600 MHz and 25 °C (72 mM in C2HCl3). b.) 1H NMR spectrum of (*S*)-2H-**5** recorded at 600 MHz and 25 °C (57 mM in C2HCl3). c.) 2H NMR spectrum of (*S*)-2H-**5** recorded at 92 MHz and 25 °C (88 mM in CHCl3).
