# Supplementary figures and images for: Stereoselective solvent induced 1,3-proton transfer of an allylic alkoxide to a homoallylic alkoxide catalysed by a chiral lithium amideElectronic supplementary information (ESI) available: 1H NMR, 1H,1H-COSY NMR and 1H,1H-NOESY NMR spectra of 6; 1H NMR spectra of 5 and (S)-2H-5; 2H NMR spectrum of (S)-2H-5. See http://www.rsc.org/suppdata/p2/b1/b111676b/
Source: Royal Society of Chemistry journal article supplement (doi:10.1039/b111676b), 2002-02-28

a)

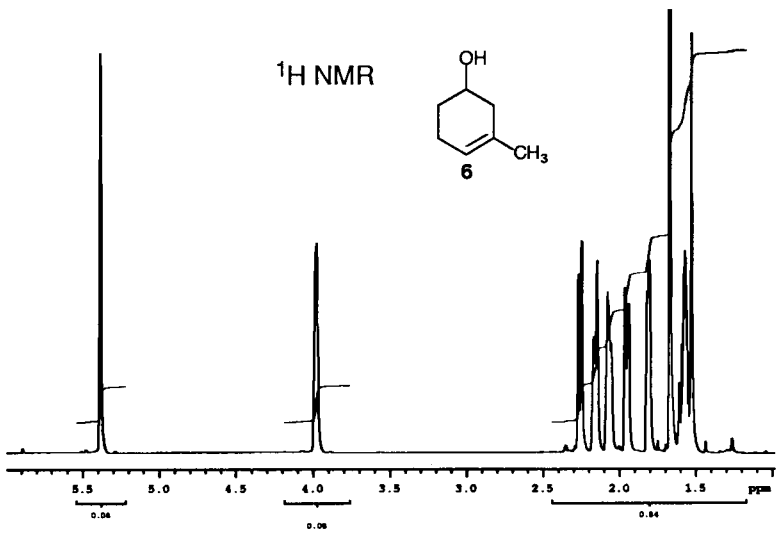

b)

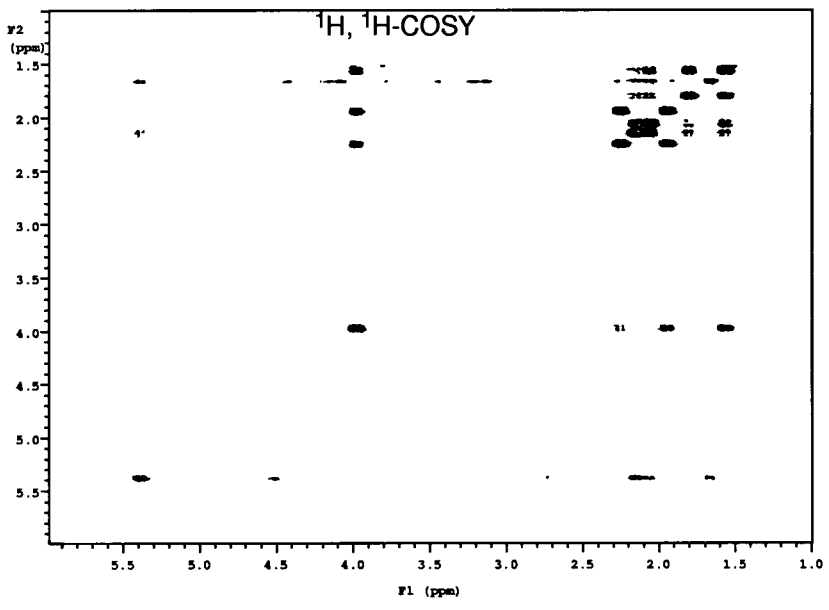

c)

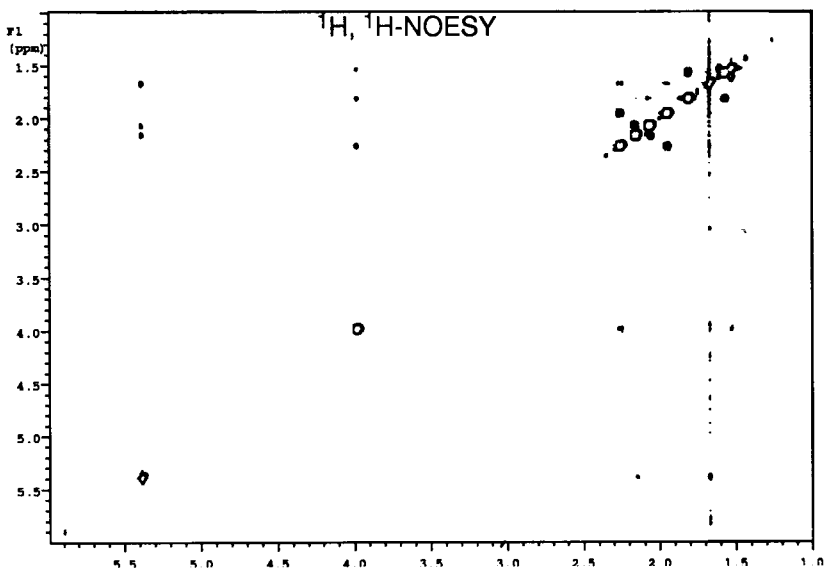

a)

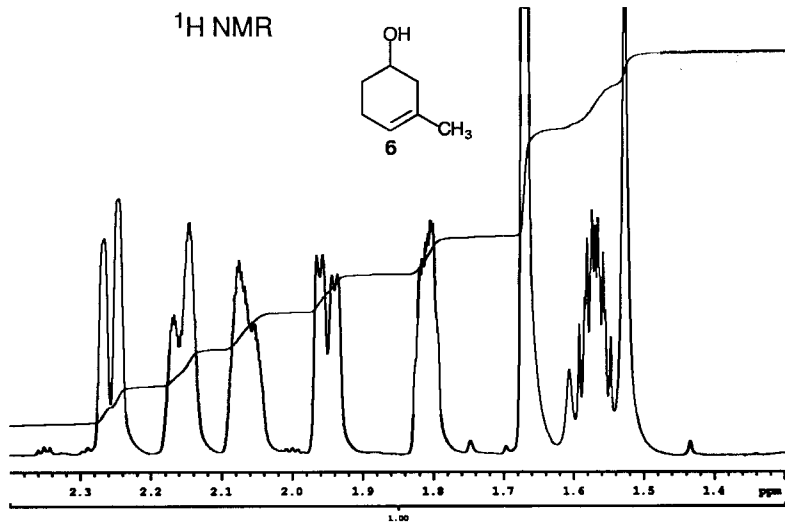

b)

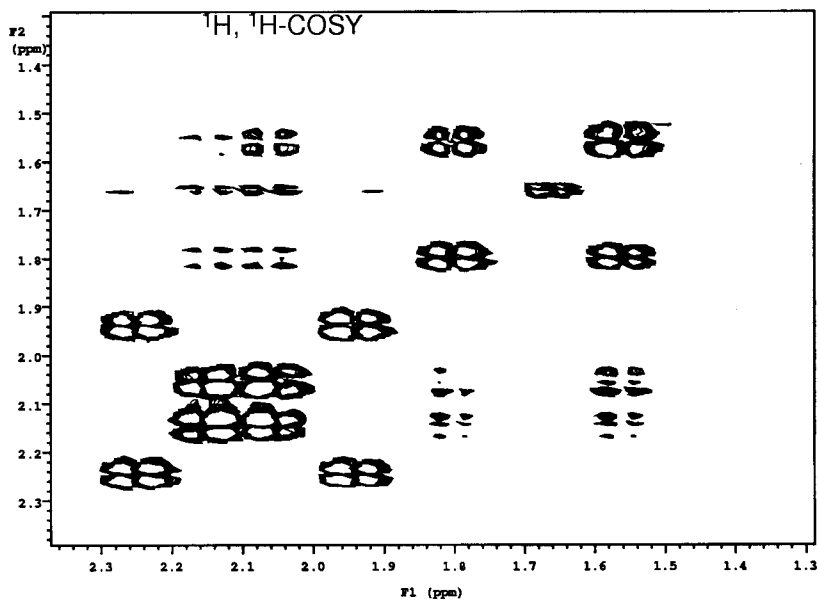

c)

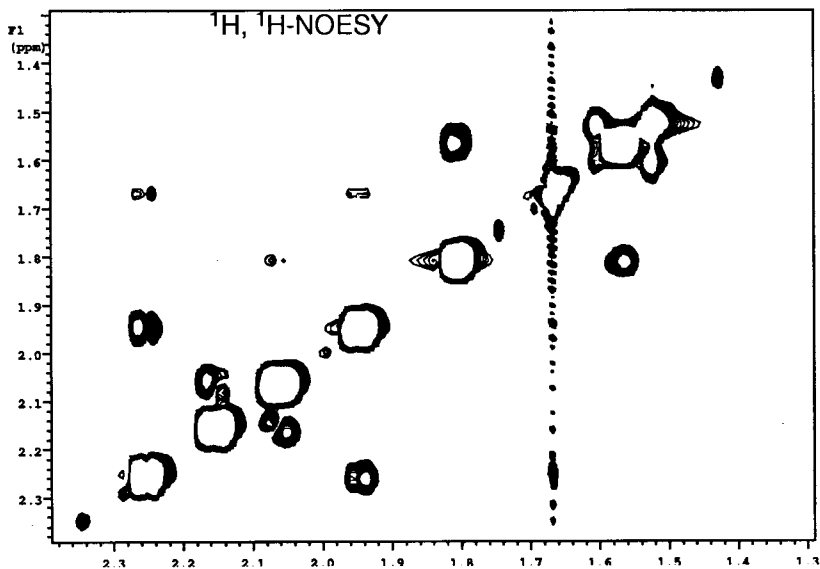

a)

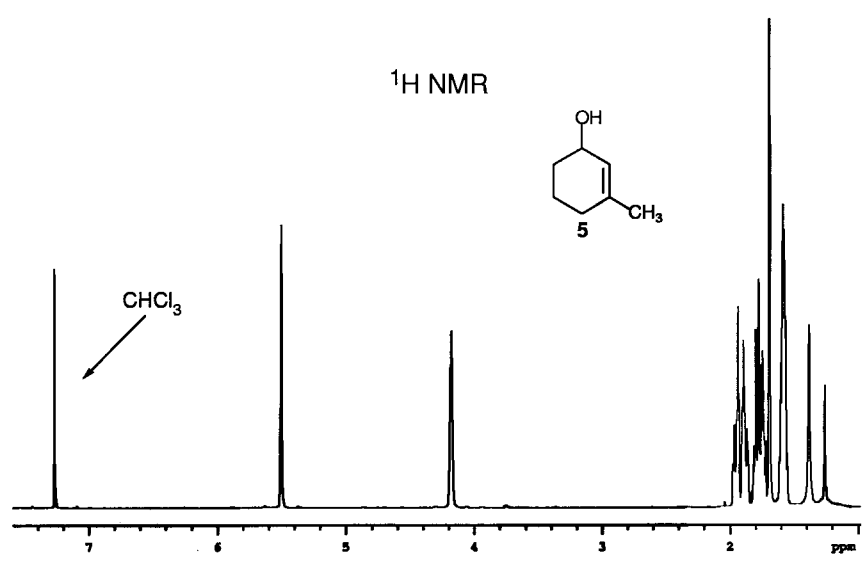

b)

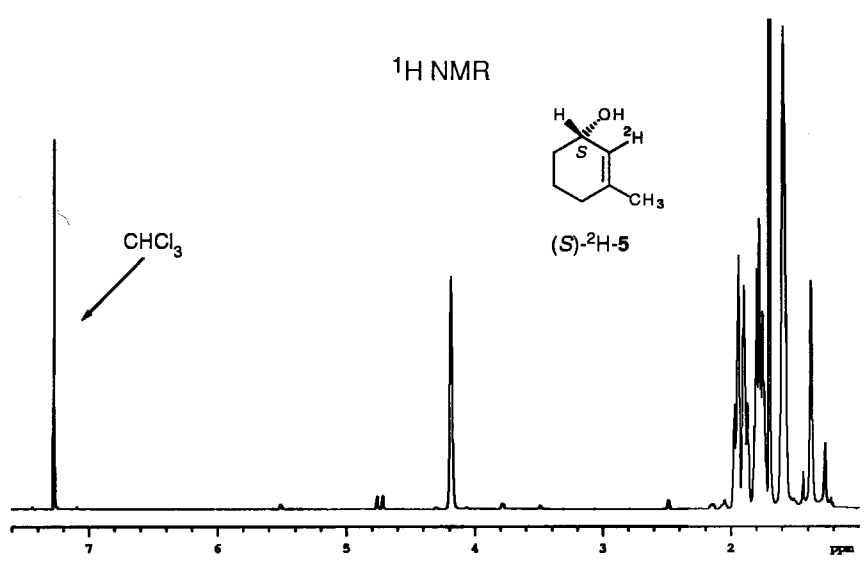

c)

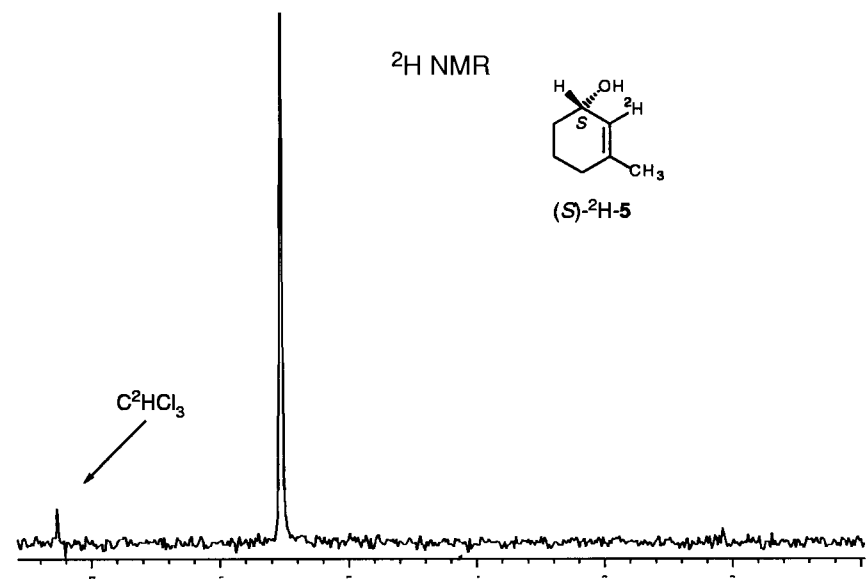

Supplement: b111676b.pdf [file b111676b.pdf]
